# Supplementary material for: Validation of Diets with Tomato Pomace in Complete Cycle Breeding of Tenebrio molitor (L.) (Coleoptera: Tenebrionidae)
Source: MDPI journal article supplement (doi:10.3390/insects15040287), 2024-04-18
Supplement: s1 [file s1]

## Supplementary Materials

**Table S1.** Conversion factors for the calculation of energy (source: Regulation (EU) 1169/2011, Annex XIV).

| Nutrient                      | Conversion Factors   |
|-------------------------------|----------------------|
| Carbohydrate (except polyols) | 17 kJ/g - 4 kcal/g   |
| Polyols                       | 10 kJ/g - 2,4 kcal/g |
| Protein                       | 17 kJ/g - 4 kcal/g   |
| Fat                           | 37 kJ/g - 9 kcal/g   |
| Salatrim                      | 25 kJ/g - 6 kcal/g   |
| Alcohol (ethanol)             | 29 kJ/g - 7 kcal/g   |
| Organic acid                  | 13 kJ/g - 3 kcal/g   |
| Fibr                          | 8 kJ/g - 2 kcal/g    |
| Erythritol                    | 0 kJ/g - 0 kcal/g    |

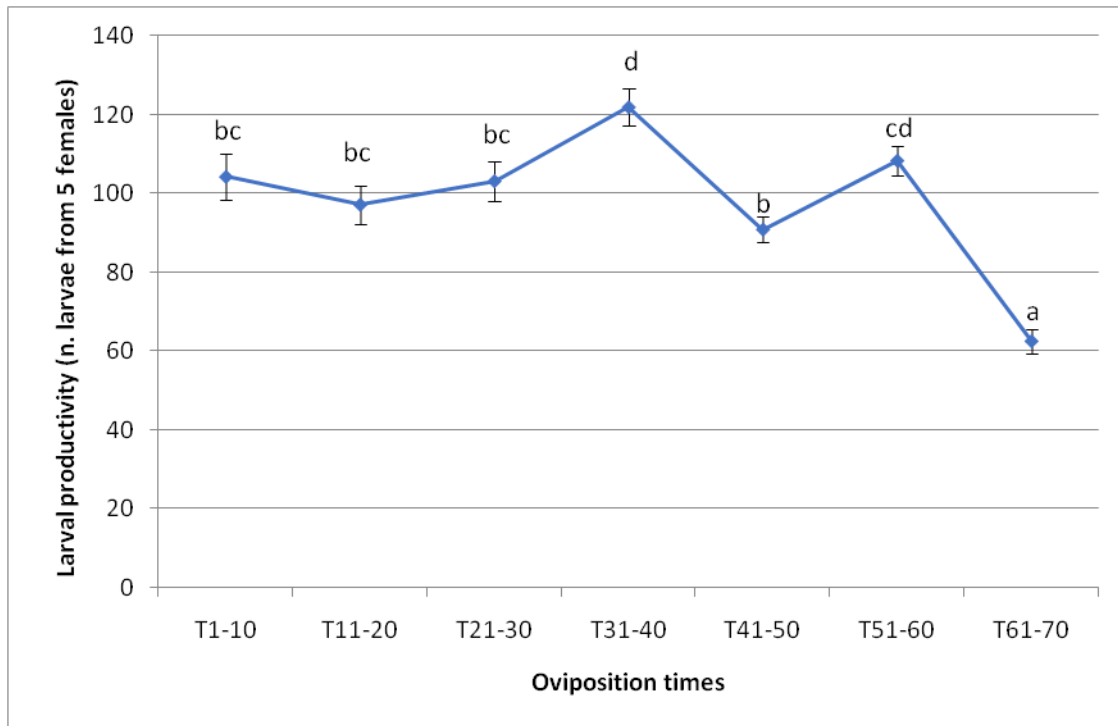

**Figure S1.** Production of larvae from adults at different oviposition periods. The mean  $\pm$  SE ( $n = 100$ ) represents the number of larvae produced by five females (replicates) every 10 days during the experimental oviposition period (70 days). Values with the same letter are not significantly different at  $\alpha = 0.05$  (two-way ANOVA and Tukey-Kramer HDS test).

**Table S2.** Individual larval weight depends on diet and development time (days) from the start of the experiment.

| <b>Diets</b> | <b>T0</b>                       | <b>T10</b>                      | <b>T20</b>                      | <b>T30</b>                      | <b>T40</b>                      | <b>Harvest</b>                  |
|--------------|---------------------------------|---------------------------------|---------------------------------|---------------------------------|---------------------------------|---------------------------------|
|              | <b>(mg larvae<sup>-1</sup>)</b> |
| <b>W</b>     | 6.1±0.1 <sup>a</sup>            | 17.2±0.4 <sup>a</sup>           | 48.6±0.9 <sup>ab</sup>          | 83.0±1.2 <sup>a</sup>           | 119.2±0.9 <sup>a</sup>          | 147.2±1.2 <sup>c</sup>          |
| <b>WY</b>    | 6.1±0.0 <sup>a</sup>            | 17.5±0.4 <sup>a</sup>           | 56.7±1.1 <sup>c</sup>           | 96.4±1.7 <sup>b</sup>           | 129.2±2.0 <sup>b</sup>          | 145.0±1.0 <sup>bc</sup>         |
| <b>WTB</b>   | 6.1±0.1 <sup>a</sup>            | 18.0±0.4 <sup>a</sup>           | 57.7±1.4 <sup>c</sup>           | 98.9±2.7 <sup>b</sup>           | 129.5±2.1 <sup>b</sup>          | 139.4±2.8 <sup>ab</sup>         |
| <b>WTY</b>   | 6.2±0.0 <sup>a</sup>            | 18.9±0.5 <sup>a</sup>           | 51.0±1.8 <sup>b</sup>           | 91.7±2.6 <sup>b</sup>           | 130.1±3.3 <sup>b</sup>          | 138.4±2.0 <sup>ab</sup>         |
| <b>WT</b>    | 6.0±0.0 <sup>a</sup>            | 17.7±0.6 <sup>a</sup>           | 46.2±0.8 <sup>a</sup>           | 83.0±1.3 <sup>a</sup>           | 117.8±1.7 <sup>a</sup>          | 133.3±1.7 <sup>a</sup>          |

Wheat bran (W); wheat bran supplemented whit yeast (WY); wheat bran supplemented with tomato pomace and brewer's spent grain (WTB); wheat bran supplemented whit tomato pomace and yeast (WTY); wheat bran supplemented whit tomato pomace (WT). Means ± SE (*n* = 10) with the same letter in the same column are not significantly different at  $\alpha = 0.05$  (one-way ANOVA followed by Tukey-Kramer HSD test).
